# Supplementary material for: Biotransformation of Resveratrol: New Prenylated trans-Resveratrol Synthesized by Aspergillus sp. SCSIOW2
Source: PubMed Central journal article supplement (PMC6274042; doi:10.3390/molecules21070883), 2016-07-06
Supplement: molecules-21-00883-s001.pdf [file molecules-21-00883-s001.pdf]

# Supplementary Materials: Biotransformation of Resveratrol: New Prenylated *trans*-Resveratrol Synthesized by *Aspergillus* sp. SCSIOW2

Liyan Wang, Yanhua Wu, Yongtao Chen, Jiaxin Zou and Xiaofan Li

**Table S1.** Conformer distribution of **1** in solvated models (methanol) calculation at the B3LYP/aug-cc-PVDZ level.

| Conformers | Contribution % |
|------------|----------------|
| 1          | 5.50           |
| 2          | 4.99           |
| 3          | 4.21           |
| 4          | 4.13           |
| 5          | 3.63           |
| 6          | 3.30           |
| 7          | 2.88           |
| 8          | 2.78           |
| 9          | 2.78           |
| 10         | 2.43           |
| 11         | 2.35           |
| 12         | 2.33           |
| 13         | 2.29           |
| 14         | 2.29           |
| 15         | 2.27           |
| 16         | 2.23           |
| 17         | 2.00           |
| 18         | 1.97           |
| 19         | 1.90           |
| 20         | 1.85           |
| 21         | 1.84           |
| 22         | 1.82           |

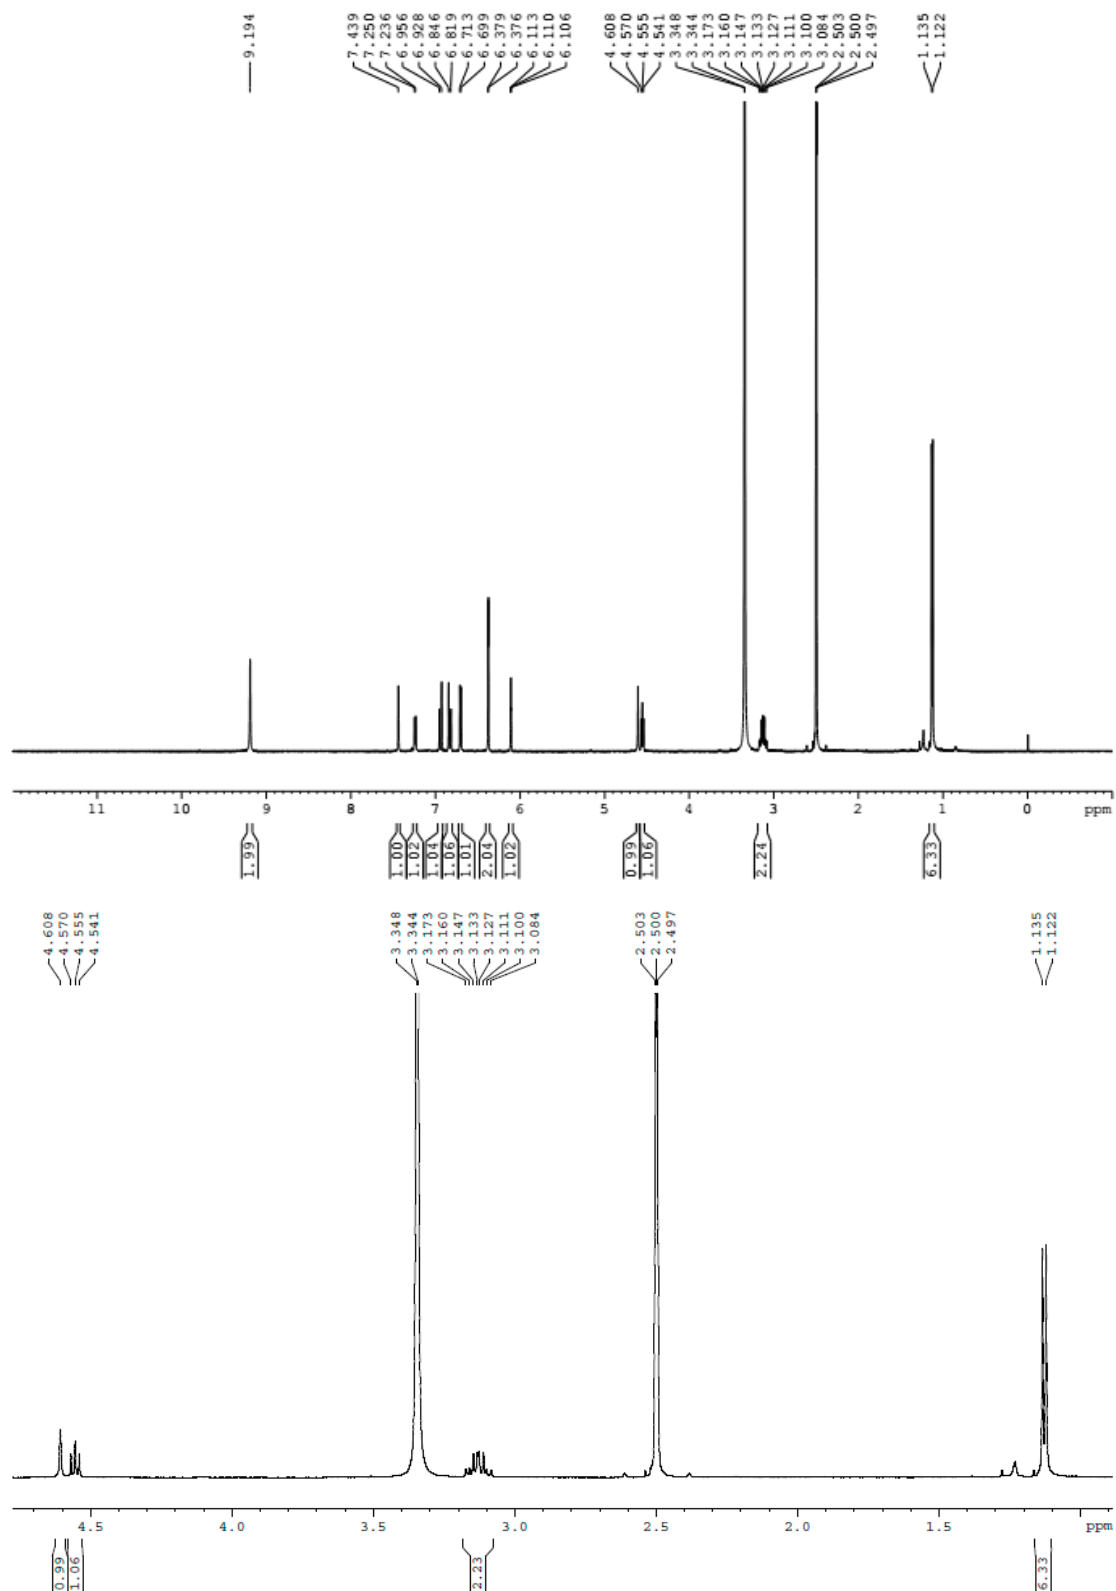

Figure S1. Cont.

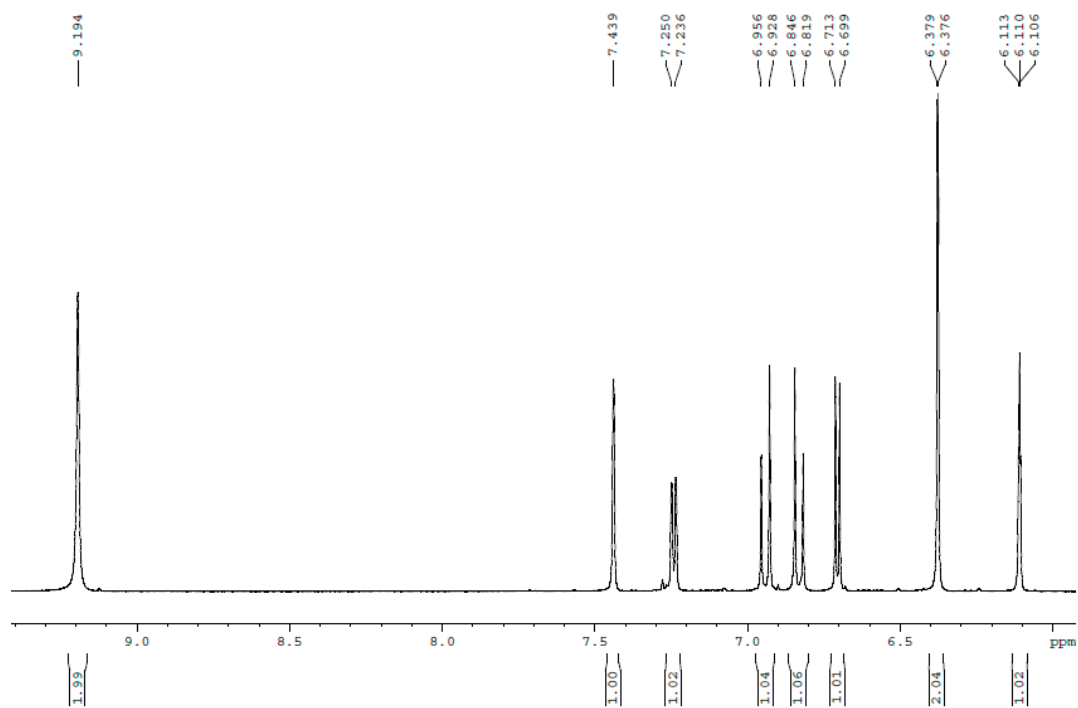Figure S1. <sup>1</sup>H-NMR spectrum of 1 in DMSO-*d*<sub>6</sub>.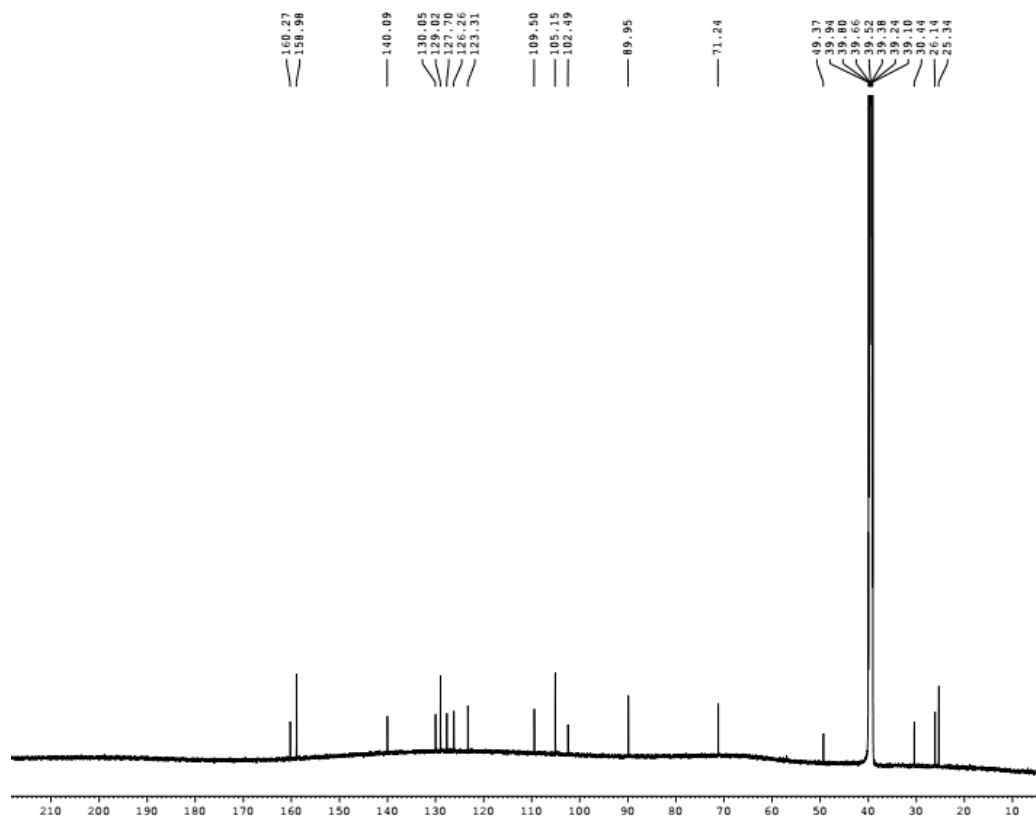

Figure S2. Cont.

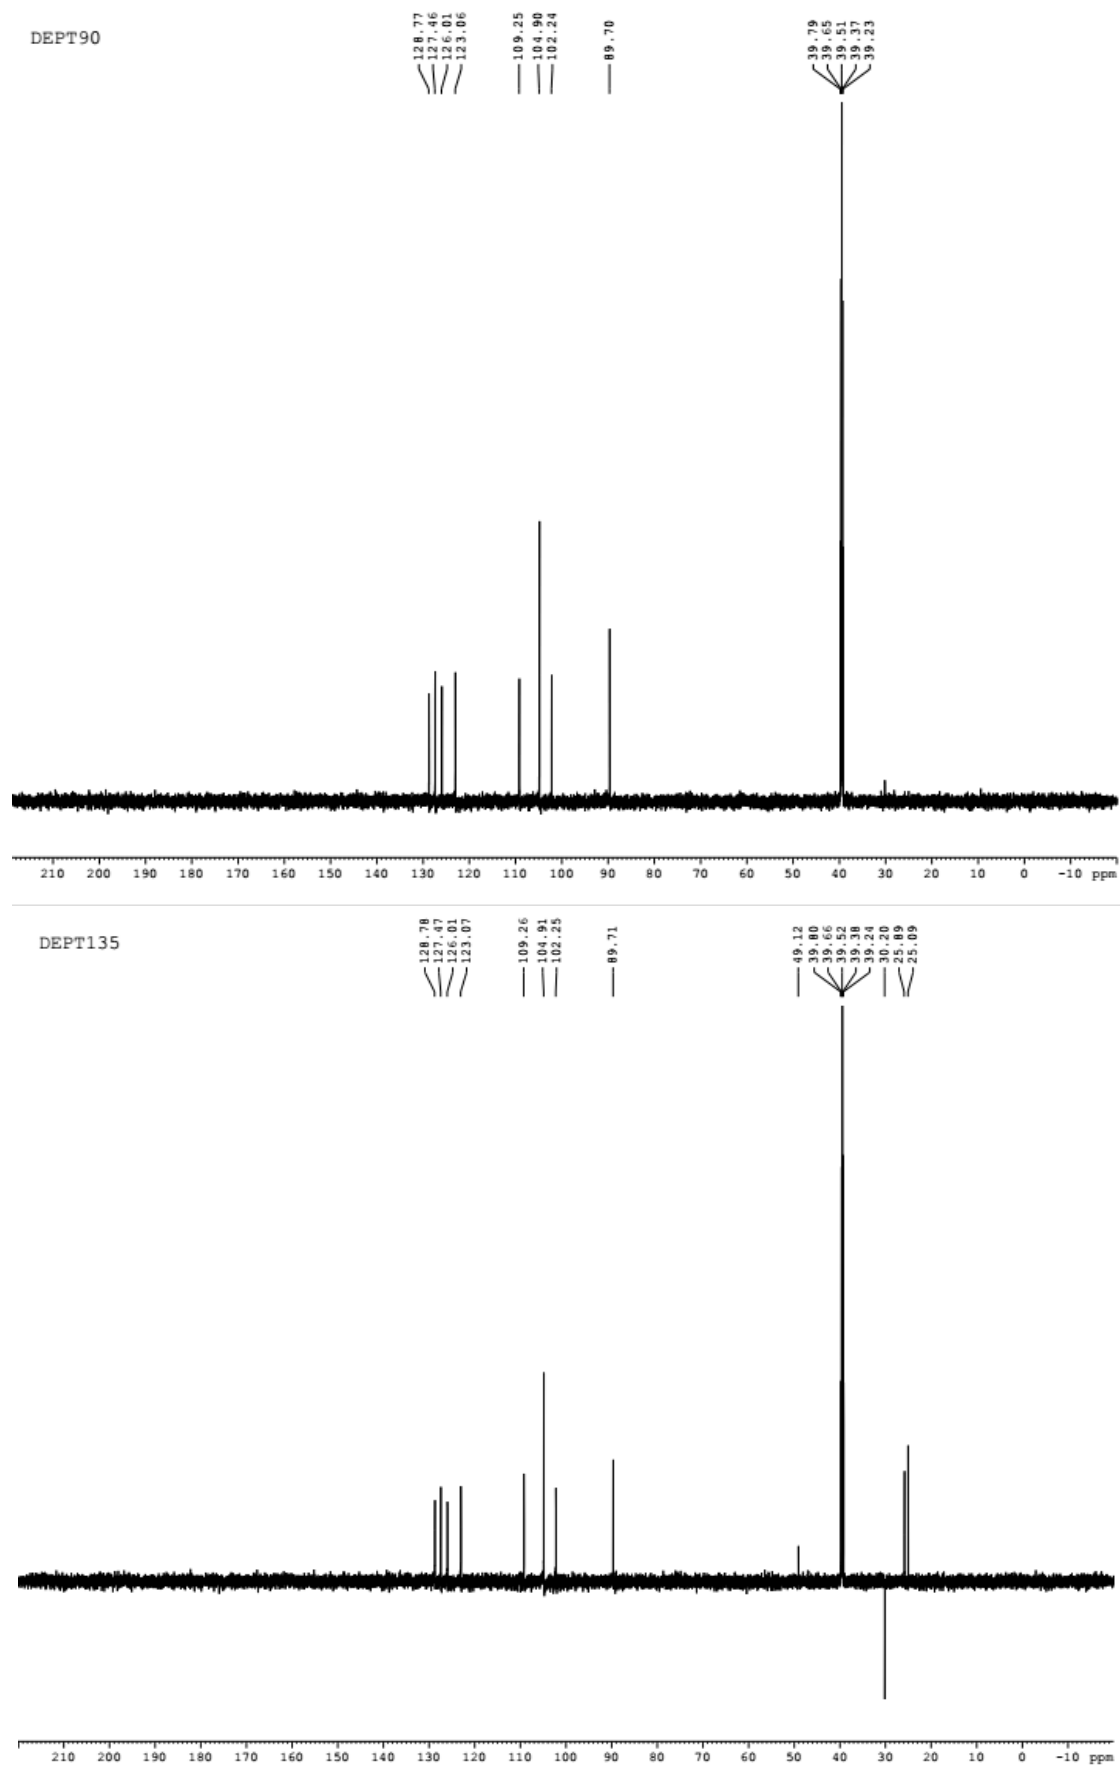

Figure S2.  $^{13}\text{C}$ -NMR spectrum and DEPT of **1** in  $\text{DMSO-}d_6$ .

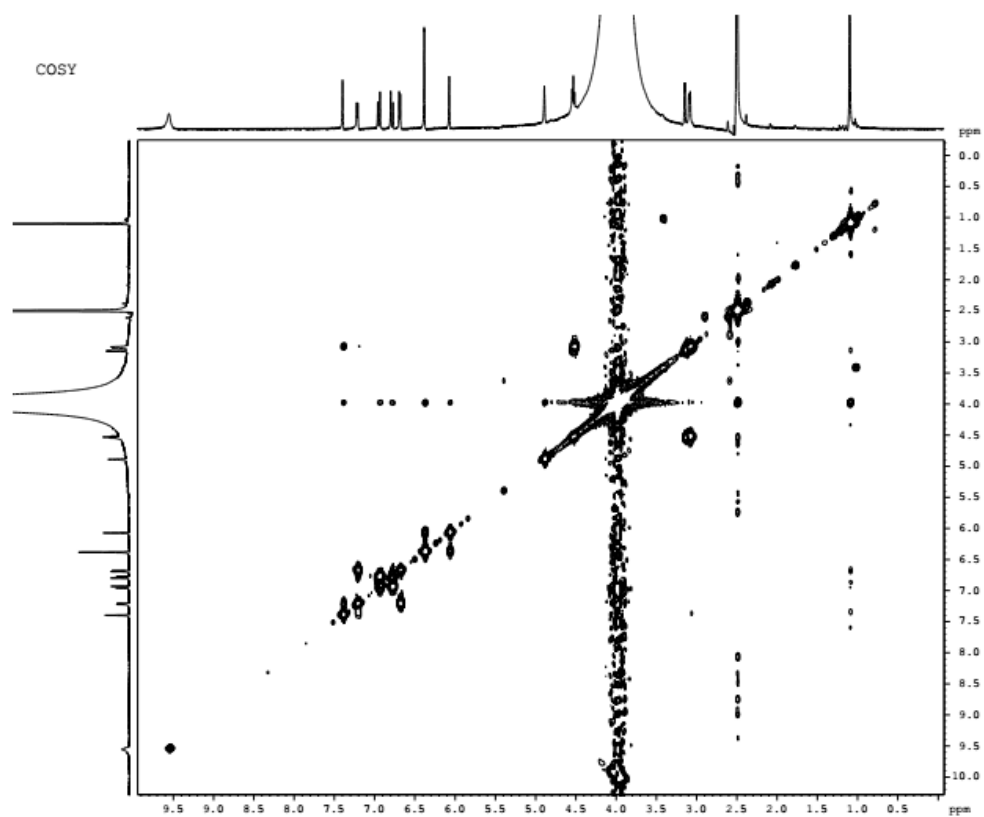

Figure S3.  $^1\text{H}$ - $^1\text{H}$  COSY spectrum of **1** in  $\text{DMSO-}d_6$ .

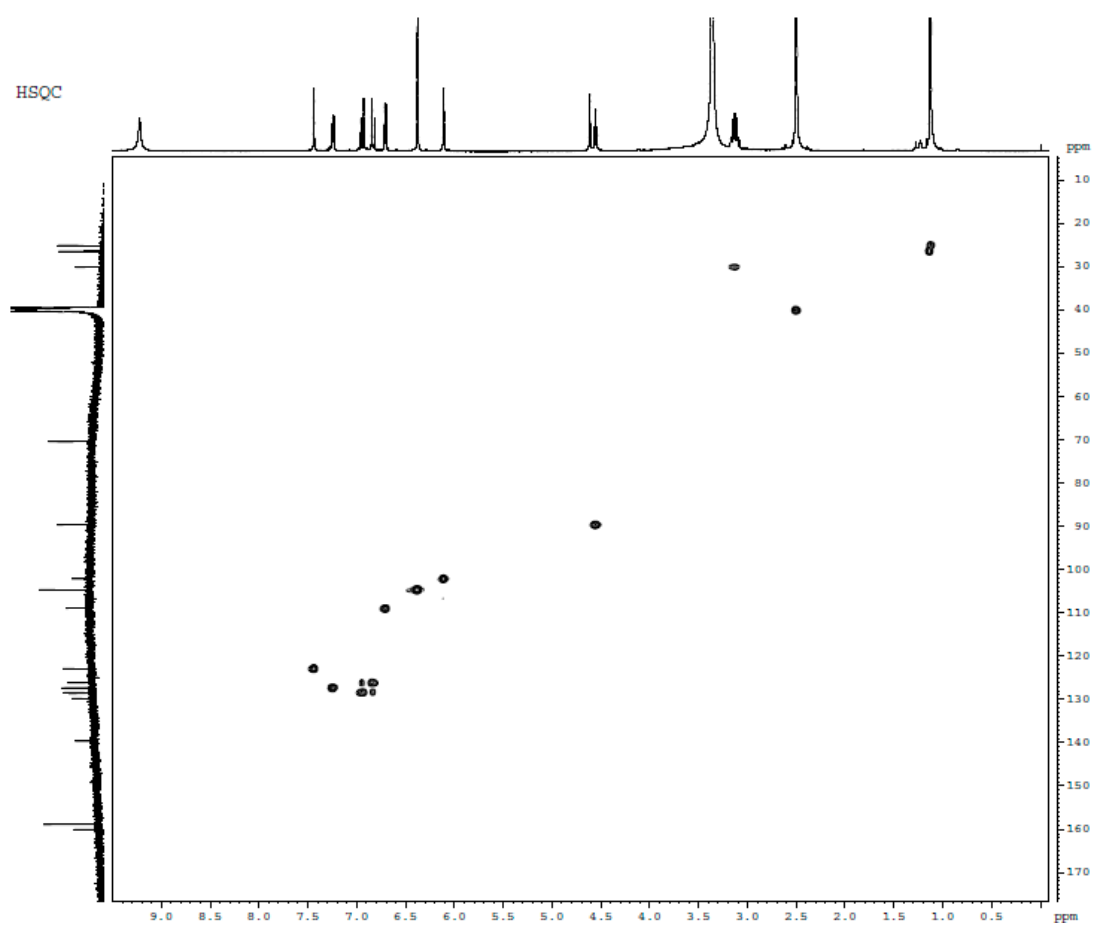

Figure S4. HSQC spectrum of **1** in  $\text{DMSO-}d_6$ .

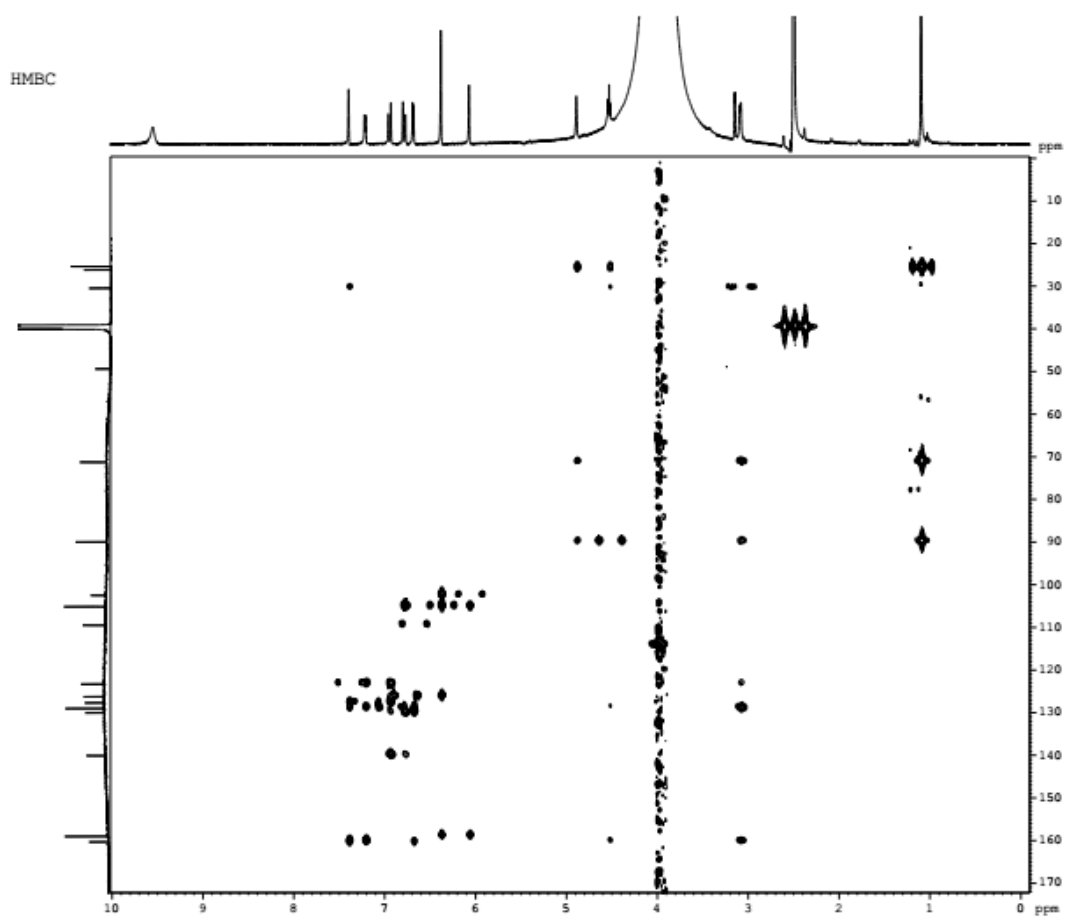

Figure S5. HMBC spectrum of 1 in DMSO-*d*<sub>6</sub>.

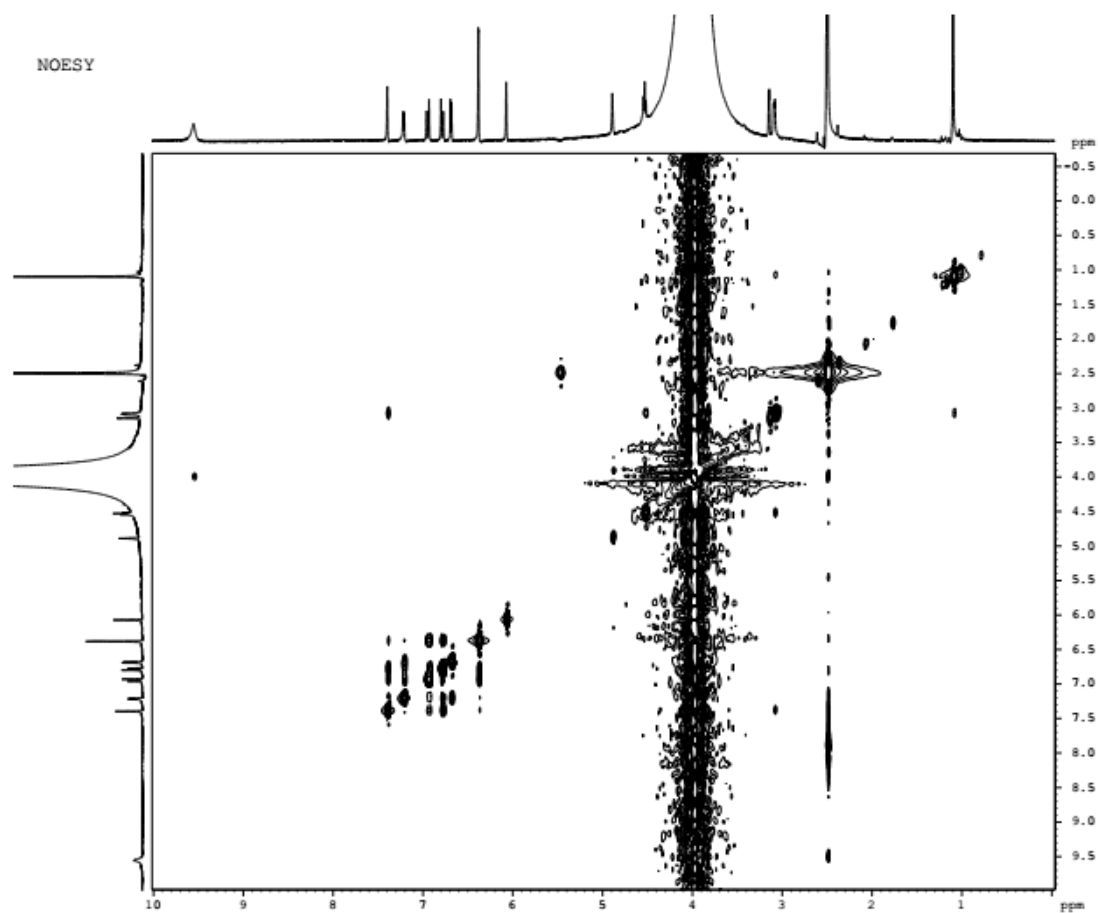

Figure S6. NOESY spectrum of 1 in DMSO-*d*<sub>6</sub>.
